# Supplementary material for: Adherence to follow-up and resource use after abnormal FIT-screening: Evaluation of the Danish colorectal cancer screening program
Source: PubMed Central journal article supplement — Endosc Int Open. 2024 May 3;12(5):E649–58. doi: 10.1055/a-2297-9622 (PMC11068436; doi:10.1055/a-2297-9622), 2024-05-03

## Supplementary material

**Table S1** Registrations defined as baseline and surveillance colonoscopies using recommended medical codes.

|                                 | <b>Register</b>             | <b>Codes</b>                                                                                                                                                                                                                         |
|---------------------------------|-----------------------------|--------------------------------------------------------------------------------------------------------------------------------------------------------------------------------------------------------------------------------------|
| <b>Baseline colonoscopy</b>     | National Patient Register   | KUJF3* (colonoscopy with/without biopsy)<br>OR<br>UXCD80 (CT colonography)<br>OR<br>ZPY1E* (Risk assessment 01, 02, 03)<br>OR<br>AFX02C (Clean colon after complete colonoscopy)<br>OR<br>AFX02D (Clean colon after CT colonography) |
|                                 | National Pathology Register | OR<br>Pathological colorectal specimen registered                                                                                                                                                                                    |
| <b>Surveillance colonoscopy</b> | National Patient Register   | KUJF3*<br>OR<br>ZPY1E*<br>OR<br>(KJFA15 or KJFA55A or KJFA55B or KJGA05 or KJGA52A or KJGA52B) & (DZ018B or P01601)                                                                                                                  |
|                                 | National Pathology Register | Pathological colorectal specimen registered                                                                                                                                                                                          |

Supplementary material

**Fig. S1** Recommendations for follow-up and adenoma surveillance in the Danish FIT-based colorectal cancer-screening program 2014-2023.

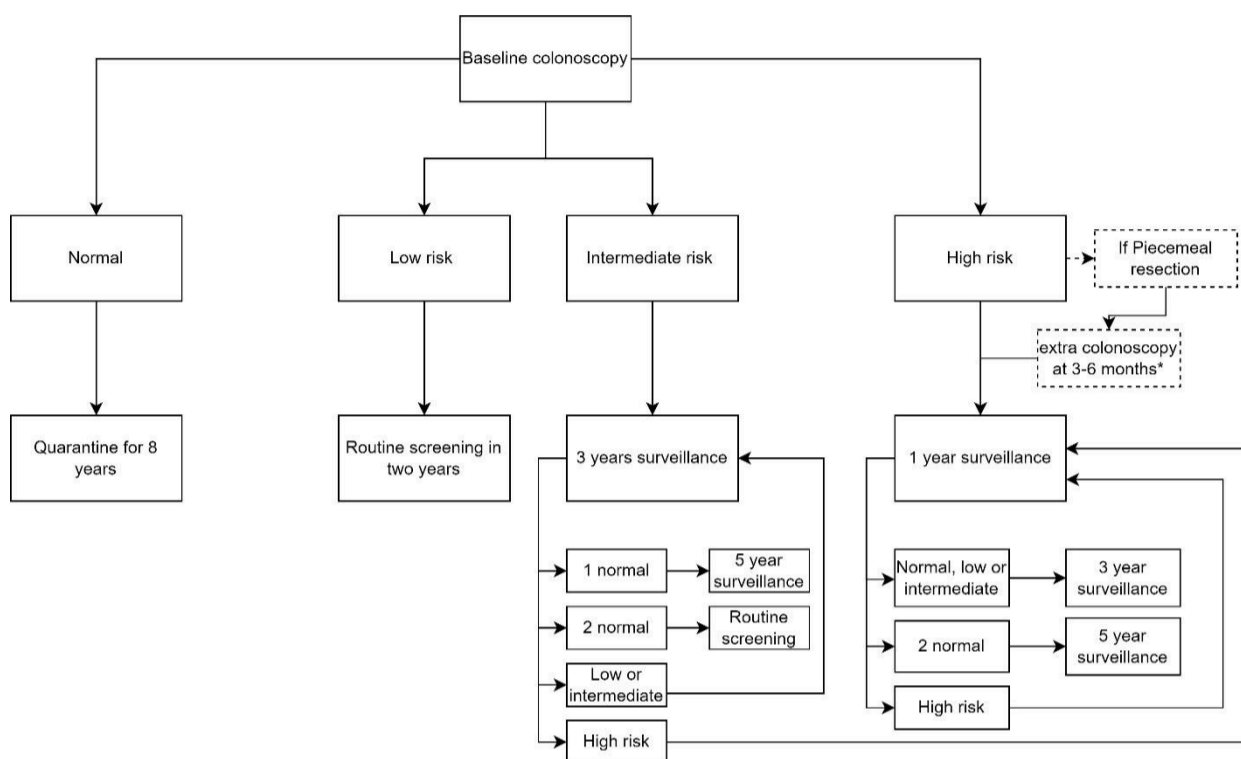

\* the endoscopist may choose to perform a colonoscopy after 3-6 months to check if resection was complete

**Fig. S2** Definition of diagnostic periods around baseline and surveillance colonoscopies in this study.

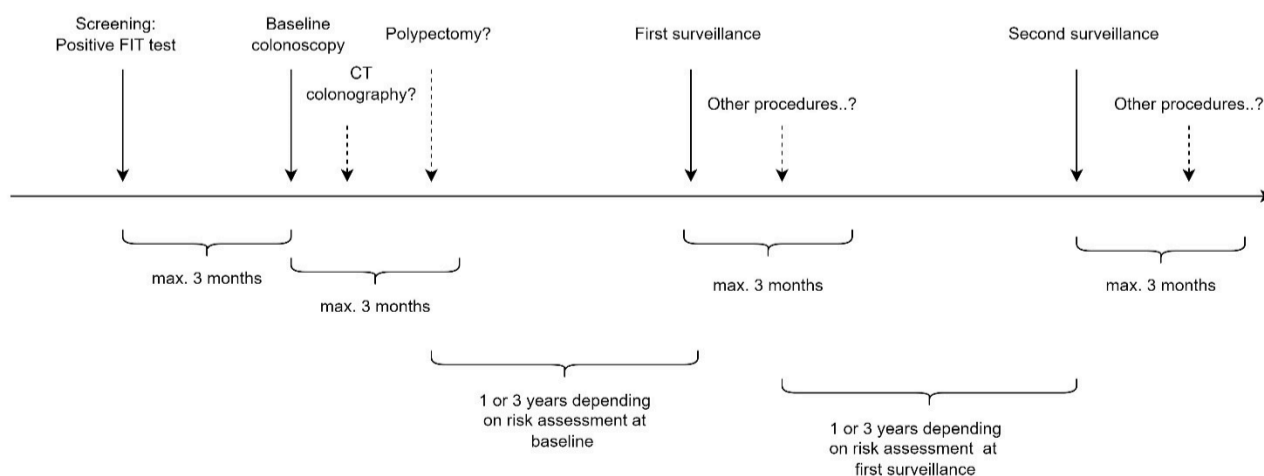

## Supplementary material

Fig. S3 Study flowchart.

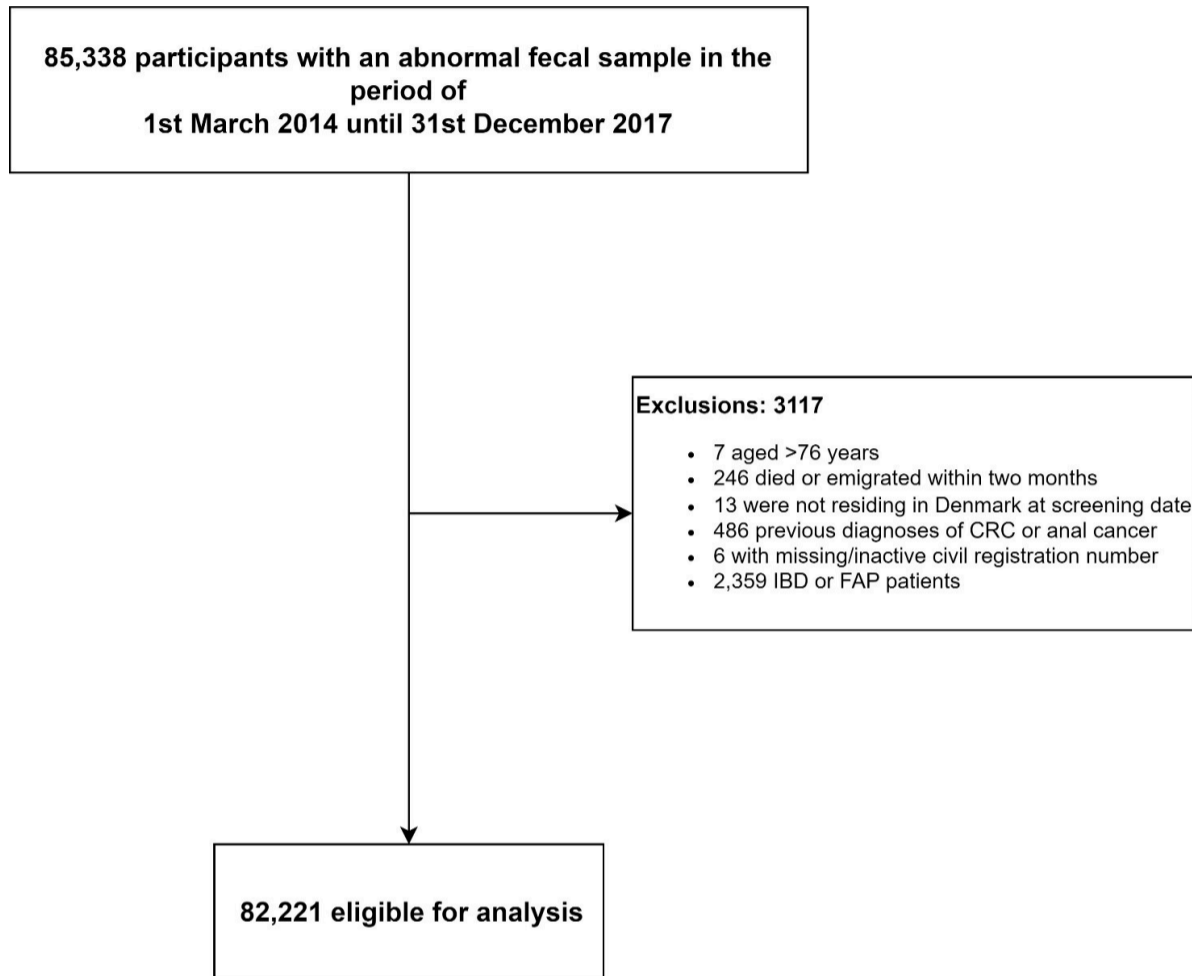

Abbreviations: CRC - Colorectal cancer, IBD - Inflammatory Bowel disease, FAP - Familial Adenomatous Polyposis

## Supplementary material

**Fig. S4** Cumulative proportions with the first endoscopic procedure performed among all FIT-positive individuals and FIT-positive without a baseline colonoscopy.

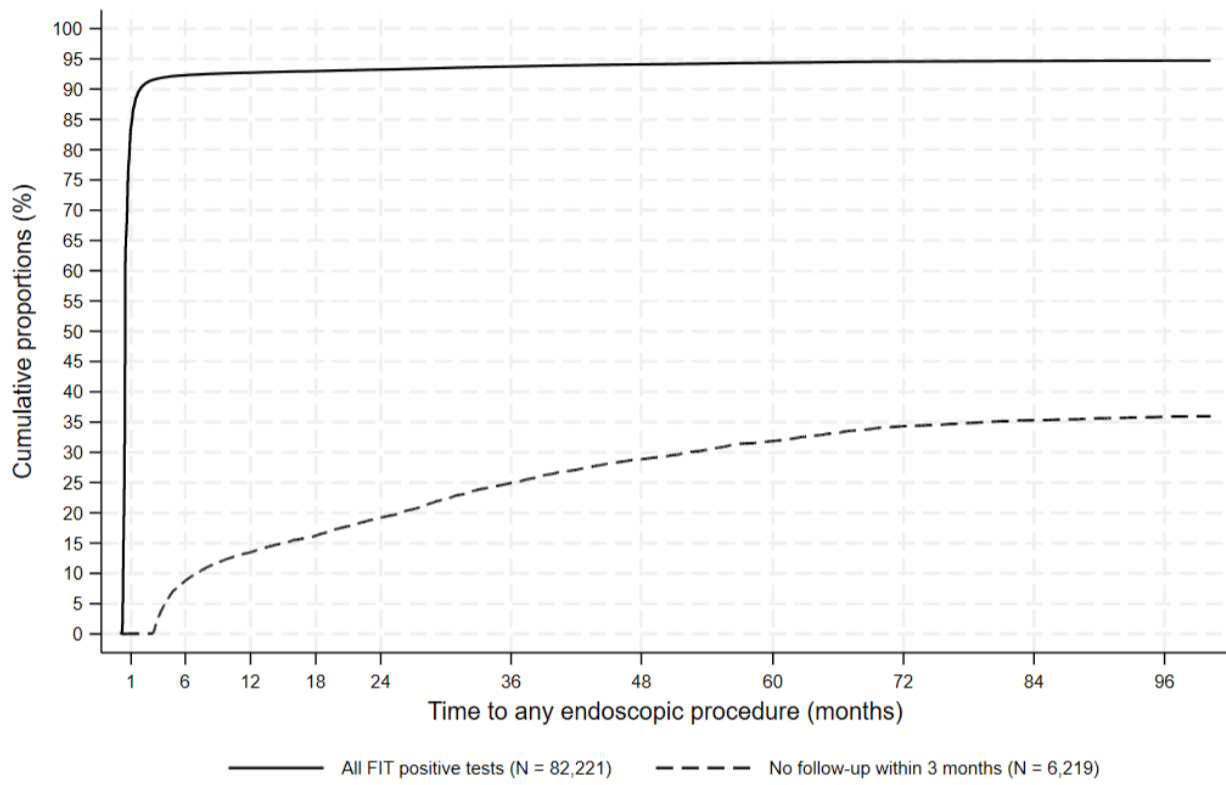

Supplement: 10-1055-a-2297-9622_22980269.pdf [file 10-1055-a-2297-9622_22980269.pdf]
